# Supplementary material
Source: PubMed Central journal article supplement (PMC4874704)
Supplement: rspb20160011supp2.pdf [file rspb20160011supp2.pdf]

## ELECTRONIC SUPPLEMENTARY INFORMATION

Keith *et al.* Coral mass spawning predicted by rapid seasonal rise in ocean temperature  
(Appendix S1, Table S2-S3, Figure S1-S3)

### Appendix S1: Environmental data

SST (°C), wind speed (10 m above surface), and rainfall rates in mm hr<sup>-1</sup> were obtained from the Tropical Rainfall Measuring Mission's (TRMM) Microwave Imager (TMI) available at: [ftp://ftp.remss.com/tmi/bmaps\\_v07.1/](ftp://ftp.remss.com/tmi/bmaps_v07.1/). These data have a 0.25° (~25 km) spatial resolution and the single satellite is used to minimise the number of sensors and time periods included in our analysis.

Monthly current speed data in m s<sup>-1</sup> were downloaded from Ocean Surface Current Analyses Real-time [OSCAR; 1] at a spatial resolution of 1° (~100 km), available at <http://oceanmotion.org/html/resources/oscar.htm>. This product uses satellite altimeter and scatterometer data to combine geostrophic and wind-driven components of the surface current every five days. At this temporal resolution, there is no reproduction of high-frequency (e.g., tidal) currents. However, as the timing of spawning is constrained by lunar phase, tidal currents will be at or near their maximum magnitude during spawning. Data were extracted for pixels containing our spawning site. Mean values were constructed for each variable from the monthly data for the years 1998-2014 and missing data were filled in the zonal direction (towards the equator) with data from the closest pixel for which data were available, except for current speed, which was filled by calculating the mean current speed of the first expanding square outwards from the desired pixel to contain data.

PAR data (Einsteins m<sup>-2</sup> day<sup>-1</sup>) were obtained from the Moderate Resolution Imaging Spectroradiometer (MODIS) aboard NASA's Aqua satellite available at <http://oceancolor.gsfc.nasa.gov>. We used the monthly climatology for 2003-2014 at 4 km resolution. A monthly time step was necessary because daily data contain large gaps, and it matches the resolution of our data on the timing of coral spawning. Monthly resolution composites of PAR from satellite have been demonstrated to effectively represent *in situ* measurements, with a reduction in the RMS difference of >50% compared with daily measurements [2]. Difference in sunset time (minutes, using the Astronomical sunset, zenith=108) was calculated using PHP 5.4.30 for the year 2010.

Table S2. Environmental variables used and the potential mechanisms by which they might act to influence the evolution of spawning synchrony i.e., as ultimate cues.

| Variable                                     | Ecological justification                                                                                                                                                                                                                                                                                                                                                                                                                                                                                                                                                                                                                  |
|----------------------------------------------|-------------------------------------------------------------------------------------------------------------------------------------------------------------------------------------------------------------------------------------------------------------------------------------------------------------------------------------------------------------------------------------------------------------------------------------------------------------------------------------------------------------------------------------------------------------------------------------------------------------------------------------------|
| Mean monthly sea surface temperature         | There is an optimum temperature range for most physiological processes [3], including fertilisation, larval survivorship and settlement in corals [4-6]. Consequently, natural selection should favour those individuals that spawn within this optimum temperature range to maximise reproductive success.                                                                                                                                                                                                                                                                                                                               |
| Photosynthetically available radiation (PAR) | <p>Corals are symbiotic organisms and derive a high proportion of their energy from endosymbiotic photosynthetic algae [7]. van Woesik [8] hypothesised that there was a minimum dose of sunlight that corals would need in order to produce their oocytes. However, the role the products of photosynthesis play in the development of oocytes remains unknown.</p> <p>High light levels, in particular when combined with high temperatures, are also a major cause of stress in photosynthetic organisms, including coral [9]. Therefore, corals may avoid spawning at times of the year when both light and temperature are high.</p> |
| Precipitation                                | Small reductions in salinity have strong effects on both fertilisation success and larval survival [10, 11] so corals are likely to avoid spawning at times of year when rainfall is high. Mendes & Woodley [10] also suggested that wet season floods could provide a source of nutrients to coral larvae and, therefore, periods of high run-off might be beneficial shortly after spawning has occurred, as in some other marine invertebrates. However, most coral larvae do not feed [12] so the validity of precipitation as an ultimate mechanism behind spawning synchrony is unclear.                                            |
| Wind speed                                   | High wind speed is predicted to produce turbulence that would disperse gametes throughout the water column and therefore reduce density and fertilisation success [13, 14]. In addition, turbulent water can break up embryos which might reduce larval or post-settlement survivorship [15]. Moderate wind speeds, however, might help to break up gamete bundles to avoid self-fertilisation.                                                                                                                                                                                                                                           |
| Difference in sunset time                    | Hypothesised to be a reliable proximate cue for tropical plants where there is little variation in day length [16]                                                                                                                                                                                                                                                                                                                                                                                                                                                                                                                        |
| Ocean current speed                          | Hypothesised to influence dispersal potential owing to the reliance of coral larvae on ocean currents [17]                                                                                                                                                                                                                                                                                                                                                                                                                                                                                                                                |

Table S3. Pearson correlation coefficients between normalised and scaled environmental variables.

|              | PAR 10 month | PAR change | Rainfall | Wind speed | Sunset time | SST mean | Current speed |
|--------------|--------------|------------|----------|------------|-------------|----------|---------------|
| SST change   | -0.27        | 0.32       | -0.08    | -0.37      | -0.43       | 0.32     | -0.02         |
| PAR 10 month |              | -0.24      | -0.38    | -0.11      | 0.32        | 0.09     | 0.19          |
| PAR change   |              |            | -0.26    | 0.02       | -0.51       | -0.55    | -0.02         |
| Rainfall     |              |            |          | -0.25      | 0.04        | 0.23     | 0.08          |
| Wind speed   |              |            |          |            | 0.13        | -0.33    | -0.41         |
| Sunset time  |              |            |          |            |             | 0.18     | 0.04          |
| SST mean     |              |            |          |            |             |          | 0.06          |

Figure S1. Differences in the baseline likelihood of spawning across (a) sampled reefs, and (b) months. Offset is from the mean intercept of the spawning season model. Reef IDs can be linked to geographical information in Table 1.

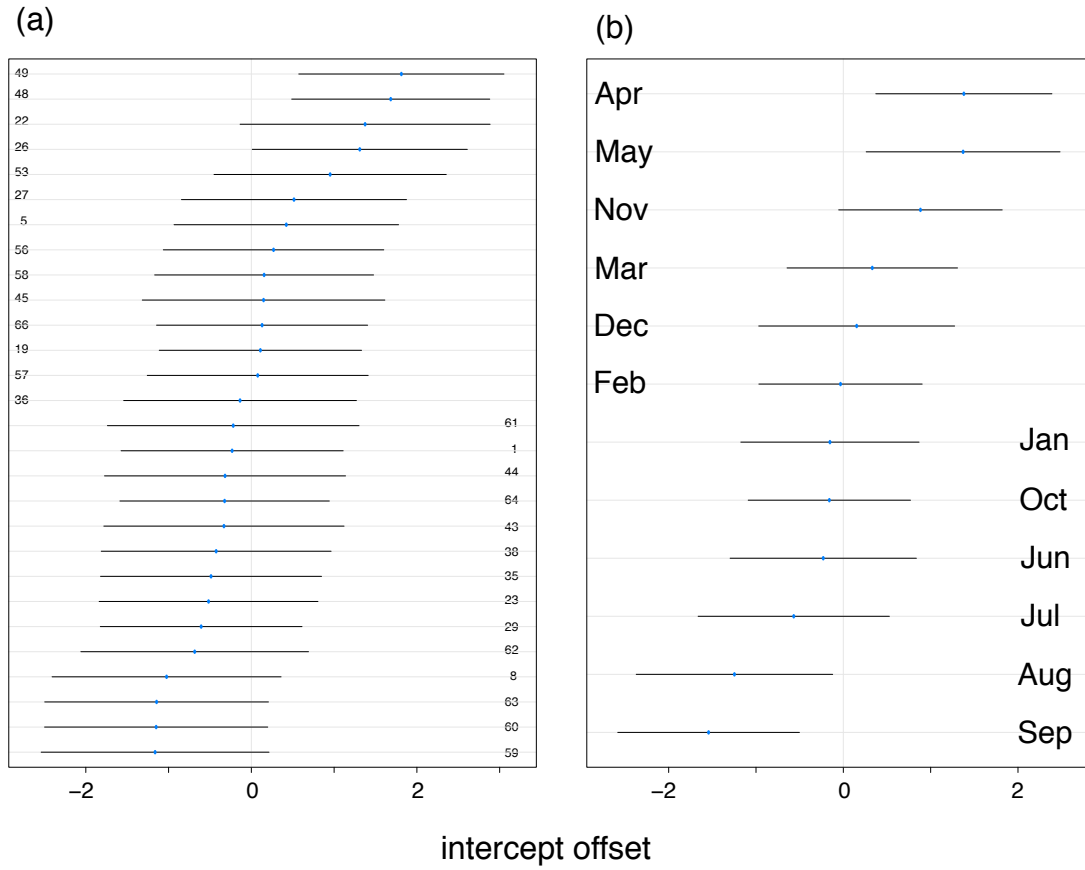

Figure S2. Differences in the baseline likelihood of spawning across months. Offset is from the mean intercept of the peak spawning model.

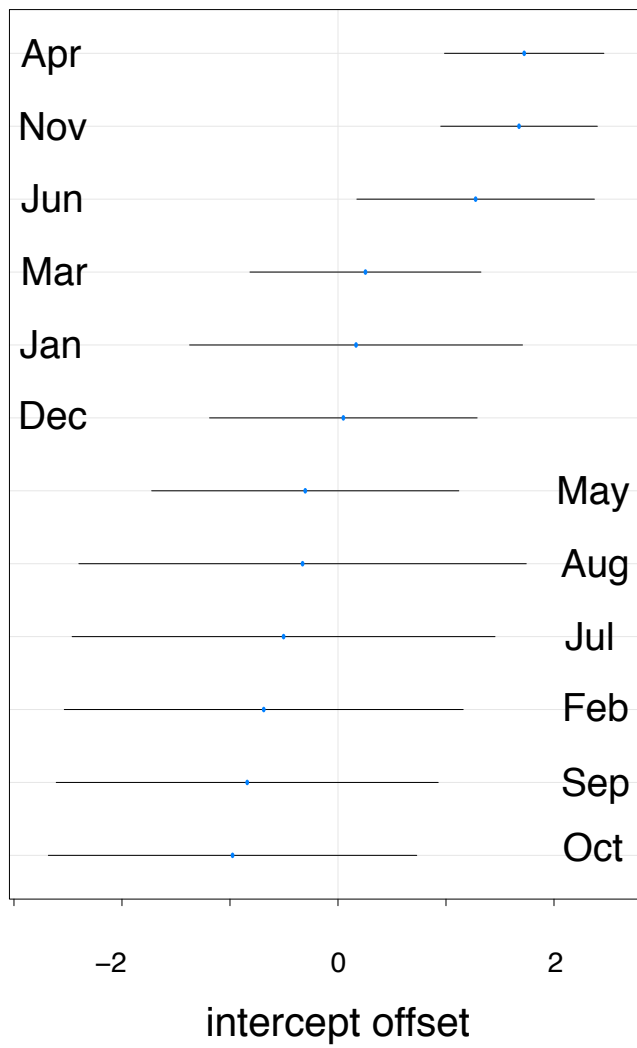

Figure S3. Actual change in sea surface temperature (SST) between months by individual reef. Plot titles include reef name and latitude. Bars represent months from January to December (left to right).

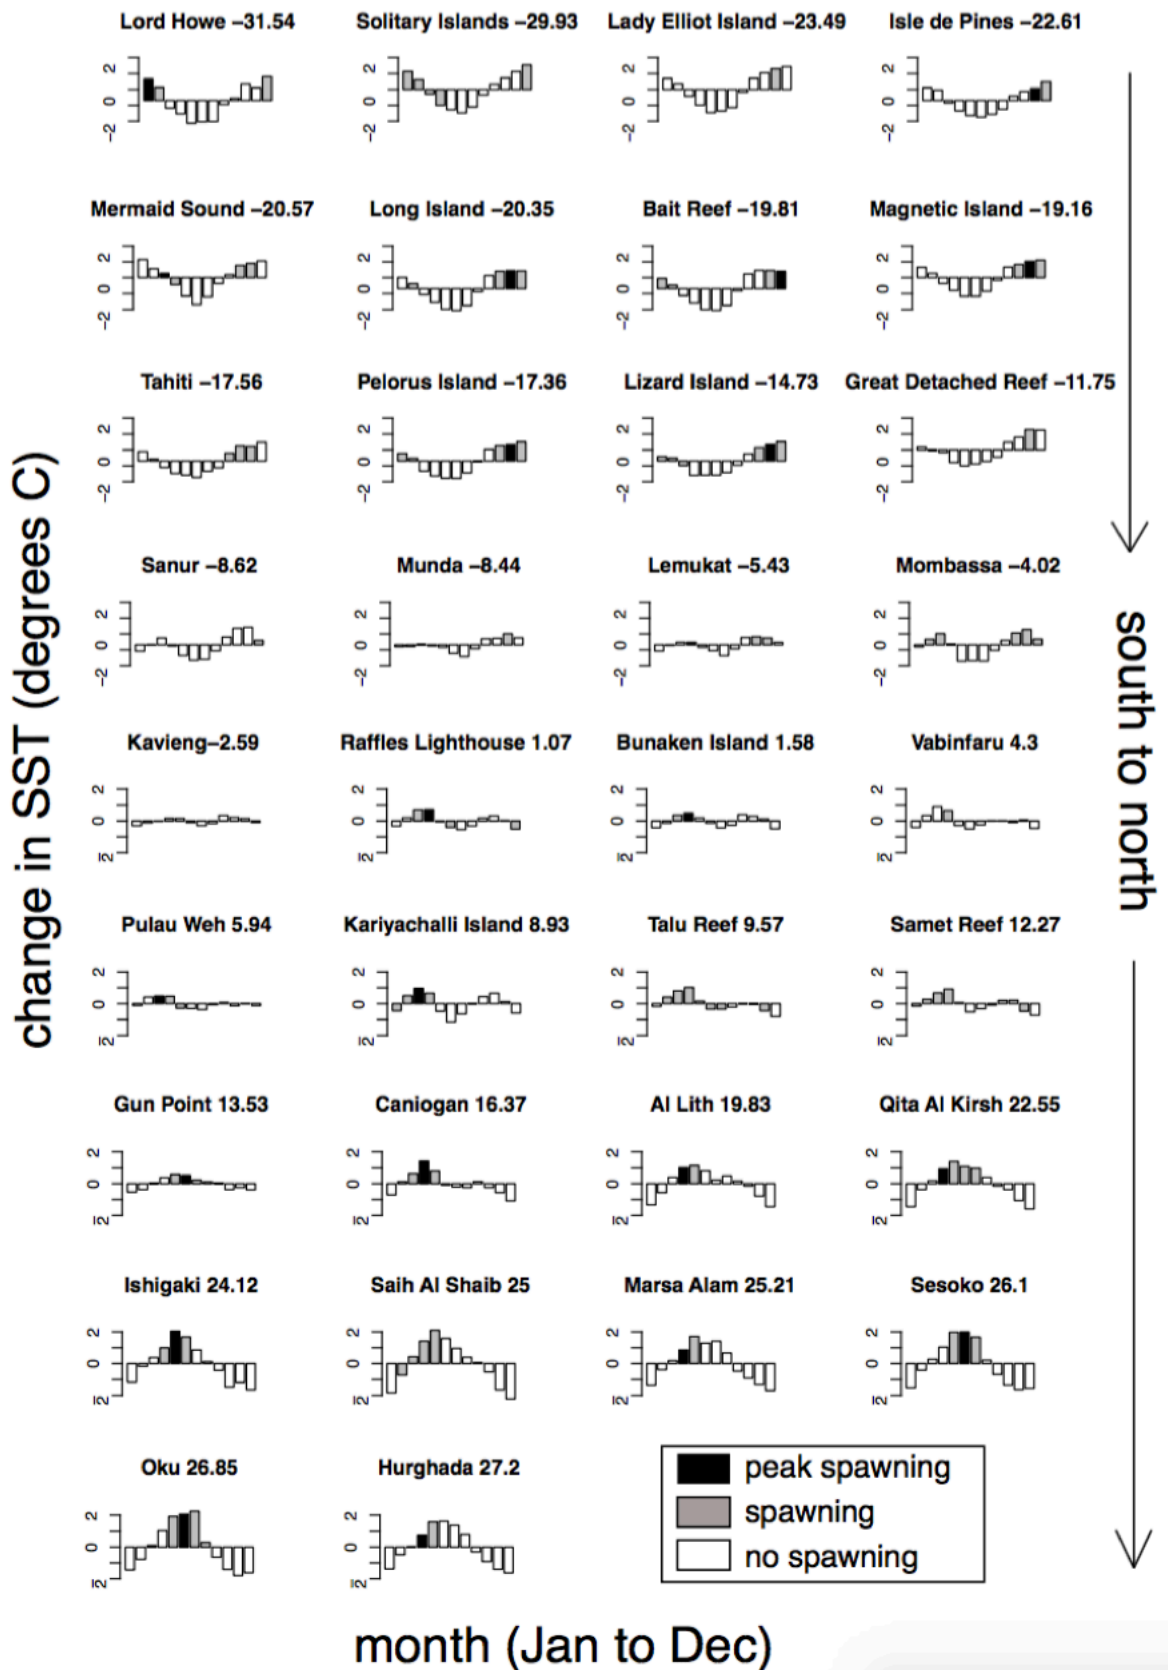

## REFERENCES

- [1] Bonjean, F. & Lagerloef, G.S.E. 2002 Diagnostic Model and Analysis of the Surface Currents in the Tropical Pacific Ocean. *J. Phys. Ocean.* **32**, 2938-2954. (doi:10.1175/1520-0485(2002)032<2938:DMAAOT>2.0.CO;2).
- [2] Frouin, R., McPherson, J., Ueyoshi, K. & Franz, B.A. 2012 A time series of photosynthetically available radiation at the ocean surface from SeaWiFS and MODIS data. In *Remote Sensing of the Marine Environment II* (Kyoto, Japan).
- [3] Pörtner, H. 2001 Climate change and temperature-dependent biogeography: oxygen limitation of thermal tolerance in animals. *Naturwissenschaften* **88**, 137-146. (doi:10.1007/s001140100216).
- [4] Jokiel, P.L. & Coles, S.L. 1990 Response of Hawaiian and other Indo-Pacific reef corals to elevated temperature. *Coral Reefs* **8**, 155-162. (doi:10.1007/BF00265006).
- [5] Nozawa, Y. & Harrison, P.L. 2007 Effects of elevated temperature on larval settlement and post-settlement survival in scleractinian corals, *Acropora solitaryensis* and *Favites chinensis*. *Mar. Biol.* **152**, 1181-1185. (doi:10.1007/s00227-007-0765-2).
- [6] Woolsey, E.S., Keith, S.A., Byrne, M., Schmidt-Roach, S. & Baird, A.H. 2015 Latitudinal variation in thermal tolerance thresholds of early life stages of corals. *Coral Reefs* **34**, 471-478. (doi:10.1007/s00338-014-1253-z).
- [7] Muscatine, L. 1990 The role of symbiotic algae in carbon and energy flux in reef corals. In *Ecosystems of the World 25: Coral reefs*. (ed. Z. Dubinsky), pp. 75-88. New York, Elsevier.
- [8] Van Woesik, R., Lacharaise, F. & Köksal, S. 2006 Annual cycles of solar insolation predict spawning times of Caribbean corals. *Ecol. Lett.* **9**, 390-398. (doi:10.1111/j.1461-0248.2006.00886.x).
- [9] Baird, A.H., Bhagooli, R., Ralph, P.J. & Takahashi, S. 2009 Coral bleaching: the role of the host. *Trends Ecol. Evol.* **24**, 16-20. (doi:10.1016/j.tree.2008.09.005).
- [10] Mendes, J.M. & Woodley, J.D. 2002 Timing of reproduction in *Montastrea annularis*: relationship to environmental variables. *Mar. Ecol. Prog. Ser.* **227**, 241-251. (doi:10.3354/meps227241).

- [11] Humphrey, C., Weber, M., Lott, C., Cooper, T. & Fabricius, K. 2008 Effects of suspended sediments, dissolved inorganic nutrients and salinity on fertilisation and embryo development in the coral *Acropora millepora* (Ehrenberg, 1834). *Coral Reefs* **27**, 837-850. (doi:10.1007/s00338-008-0408-1).
- [12] Baird, A.H., Birrell, C.L., Hughes, T.P., McDonald, A., Nojima, S., Page, C.A., Pratchett, M.S. & Yamasaki, H. 2009 Latitudinal variation in reproductive synchrony in *Acropora* assemblages: Japan vs. Australia. *Galaxea* **11**, 101-108. (doi:10.3755/galaxea.11.101)
- [13] Oliver, J. & Babcock, R. 1992 Aspects of the fertilization ecology of broadcast spawning corals: sperm dilution effects and in situ measurements of fertilization. *Biol. Bull.* **183**, 409-417. (doi:10.2307/1542017).
- [14] Van Woesik, R. 2010 Calm before the spawn: Global coral spawning patterns are explained by regional wind fields. *Proc. Roy. Soc. B* **277**, 715-722. (doi:10.1098/rspb.2009.1524).
- [15] Heyward, A.J. & Babcock, R.C. 1986 Self- and cross-fertilization in scleractinian corals. *Mar. Biol.* **90**, 191-195. (doi:10.1007/BF00569127).
- [16] Borchert, R., Renner, S.S., Calle, Z., Navarrete, D., Tye, A., Gautier, L., Spichiger, R. & von Hildebrand, P. 2005 Photoperiodic induction of synchronous flowering near the Equator. *Nature* **433**, 627-629. (doi:10.1038/nature03259).
- [17] Wood, S., Paris, C.B., Ridgwell, A. & Hendy, E.J. 2014 Modelling dispersal and connectivity of broadcast spawning corals at the global scale. *Global Ecol. Biogeogr.* **23**, 1-11. (doi:10.1111/geb.12101).
